# Supplementary material for: Effect of the Age-Adjusted Charlson Comorbidity Index on the Survival of Esophageal Squamous Cell Carcinoma Patients after Radical Esophagectomy
Source: MDPI journal article supplement (doi:10.3390/jcm11226737), 2022-11-14
Supplement: s1 [file s1]

## Supplementary Material

**Supplementary Table S1.** Interactions of Prognostic predictors for overall survival among patients with esophageal cancer (n=352).

| Model                                              | B      | SE    | Wald  | df | P     | HR   | 95.0% CI |       |
|----------------------------------------------------|--------|-------|-------|----|-------|------|----------|-------|
|                                                    |        |       |       |    |       |      | Lower    | Upper |
| ACCI*Tumor size <sup>#</sup>                       | -1.153 | 0.516 | 4.999 | 1  | 0.025 | 0.32 | 0.12     | 0.87  |
| ACCI group*pTNM <sup>#</sup>                       |        |       | 5.078 | 2  | 0.079 |      |          |       |
| ACCI group*pTNM(1) <sup>#</sup>                    | -1.261 | 0.996 | 1.603 | 1  | 0.205 | 0.28 | 0.04     | 2.00  |
| ACCI group*pTNM(2) <sup>#</sup>                    | -1.948 | 0.978 | 3.969 | 1  | 0.046 | 0.14 | 0.02     | 0.97  |
| ACCI group*Postoperative chemotherapy <sup>#</sup> | 1.128  | 0.477 | 5.599 | 1  | 0.018 | 3.09 | 1.21     | 7.87  |

<sup>#</sup>Adjusted to gender, ACCI, tumor size, pTNM, degree of differentiation, postoperative chemotherapy, and postoperative complications.

**Supplementary Table S2.** Interactions of Prognostic predictors for cancer-specific survival among patients with esophageal cancer (n=343).

| Model                                              | B      | SE    | Wald  | df | P     | HR   | 95.0% CI |       |
|----------------------------------------------------|--------|-------|-------|----|-------|------|----------|-------|
|                                                    |        |       |       |    |       |      | Lower    | Upper |
| ACCI*Tumor size <sup>#</sup>                       | -1.099 | 0.545 | 4.065 | 1  | 0.044 | 0.33 | 0.11     | 0.97  |
| ACCI group*pTNM <sup>#</sup>                       |        |       | 4.804 | 2  | 0.091 |      |          |       |
| ACCI group*pTNM(1) <sup>#</sup>                    | -1.282 | 0.999 | 1.646 | 1  | 0.200 | 0.28 | 0.04     | 1.97  |
| ACCI group*pTNM(2) <sup>#</sup>                    | -1.962 | 0.987 | 3.951 | 1  | 0.047 | 0.14 | 0.02     | 0.97  |
| ACCI group*Postoperative chemotherapy <sup>#</sup> | 1.154  | 0.498 | 5.366 | 1  | 0.021 | 3.17 | 1.19     | 8.42  |

<sup>#</sup>Adjusted to gender, ACCI, tumor size, pTNM, degree of differentiation, postoperative chemotherapy, and postoperative complications

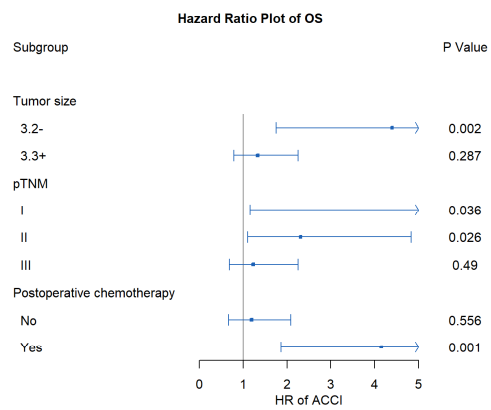

**Supplementary Figure S1.** Subgroup analysis of ACCI hazard ratio plot of overall survival.

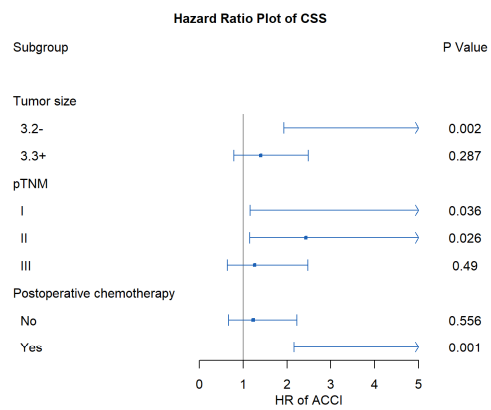

**Supplementary Figure S2.** Subgroup analysis of ACCI hazard ratio plot of cancer-specific survival.
